# Supplementary material for: Theoretical study of rhodium- and cobalt-catalyzed decarboxylative transformations of isoxazolones: origin of product selectivity
Source: Royal Society of Chemistry journal article supplement (doi:10.1039/d0qo01498b), 2021-01-01
Supplement: d0qo01498b1.pdf [file d0qo01498b1.pdf]

## *Supporting Information*

### **Theoretical Study in Rhodium- and Cobalt-Catalyzed Decarboxylative Transformation of Isoxazolone: Origin of Product Selectivity**

Wei Rong, Tian Zhang, Ting Li and Juan Li\*

Department of Chemistry, Jinan University, Guangzhou, Guangdong 510632, P. R.  
China

\*Corresponding authors. Email: tchjli@jnu.edu.cn (J. Li)

---

#### **Table of Contents**

---

|                   |                                                                   |        |
|-------------------|-------------------------------------------------------------------|--------|
| <b>Section 1.</b> | Other possible pathways (Figs. S1-S6)                             | S2-S4  |
| <b>Section 2.</b> | Energies (in Hartree) for all TS and intermediates                | S5-S8  |
| <b>Section 3.</b> | Calculated imaginary frequencies of all transition states species | S8-S10 |

---

## Section 1. Other possible pathways

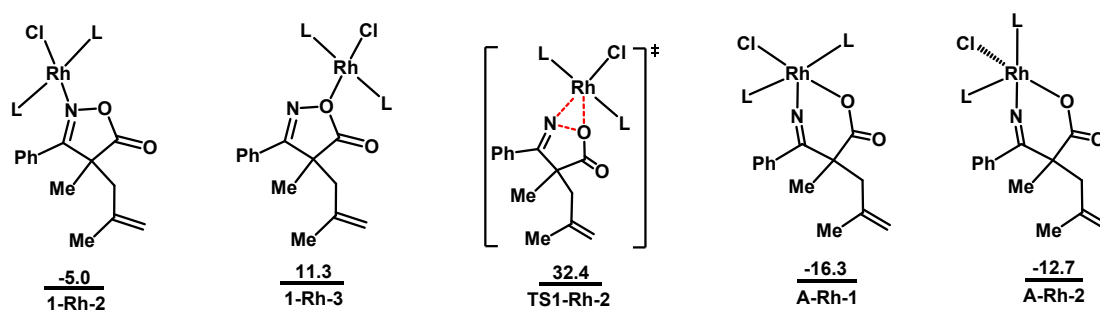

**Fig. S1** Other possible isomers of 1-Rh, TS1-Rh and A-Rh. Values shown are relative free energies in kcal/mol.

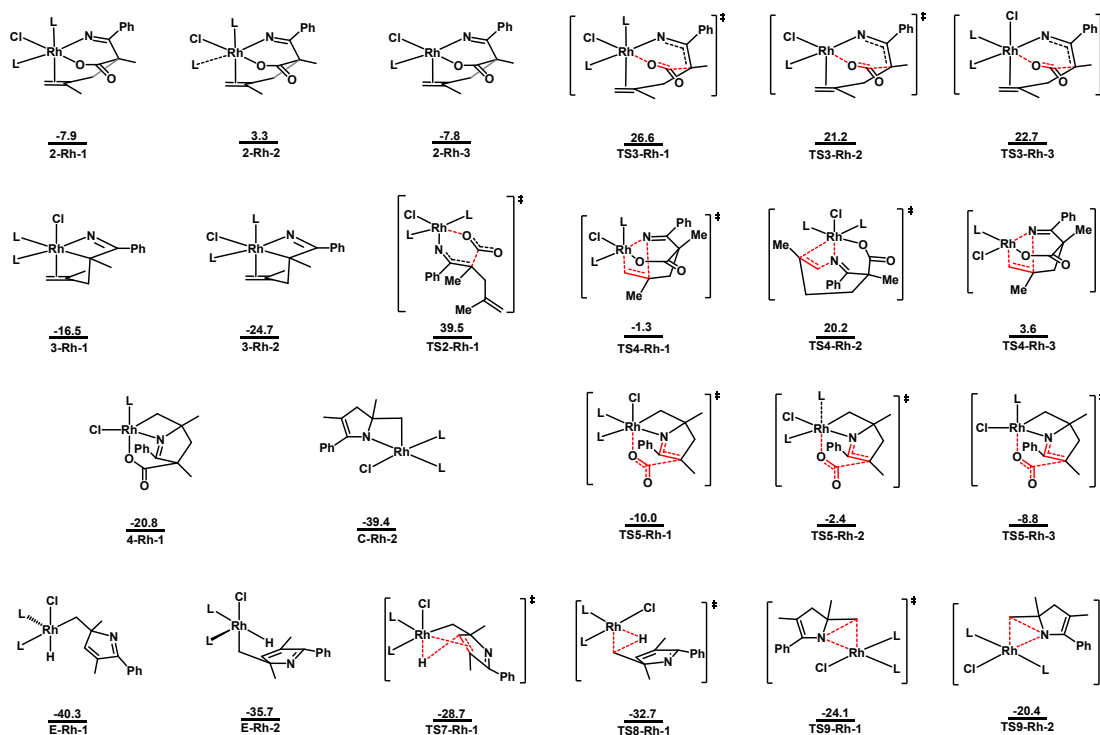

**Fig. S2** Other possible isomers of key species labeled in Figs. 2 and 3. Values shown are relative free energies in kcal/mol.

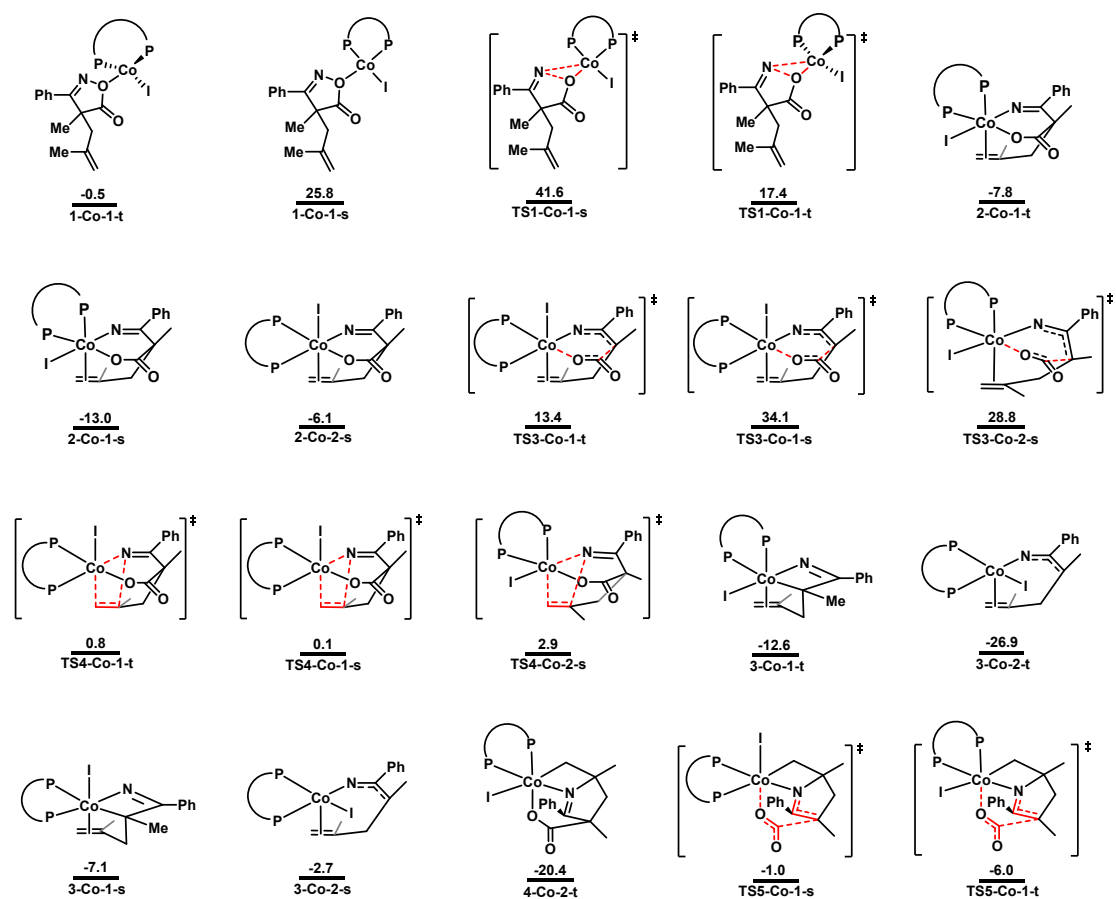

**Fig. S3** Other possible isomers of key species labeled in Fig. 4. Values shown are relative free energies in kcal/mol.

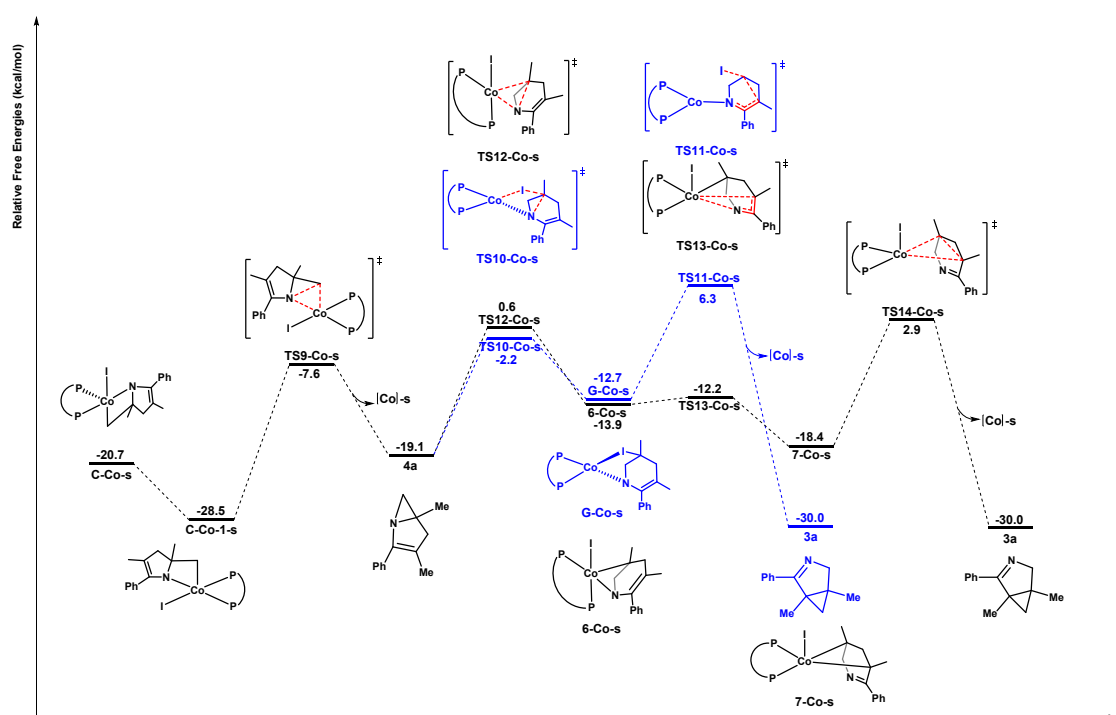

**Fig. S4** Calculated energy profiles for processes from C-Co-s to product 3a. Values

shown are relative free energies in kcal/mol.

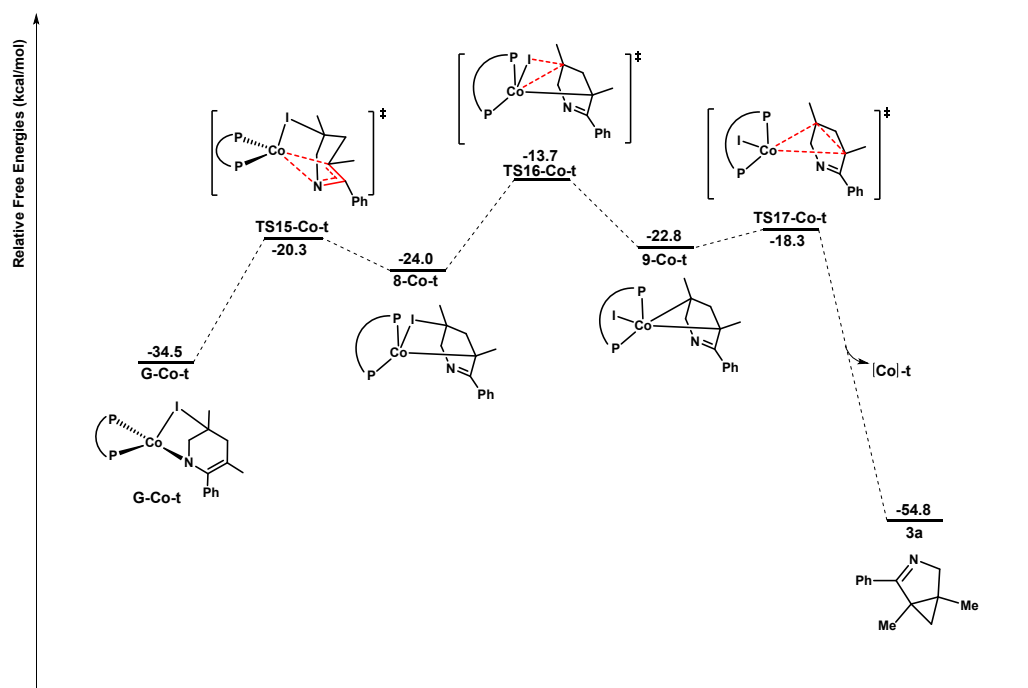

**Fig. S5** Other possible mechanism of transformation from **G-Co-t** to **3a**. Values

shown are relative free energies in kcal/mol.

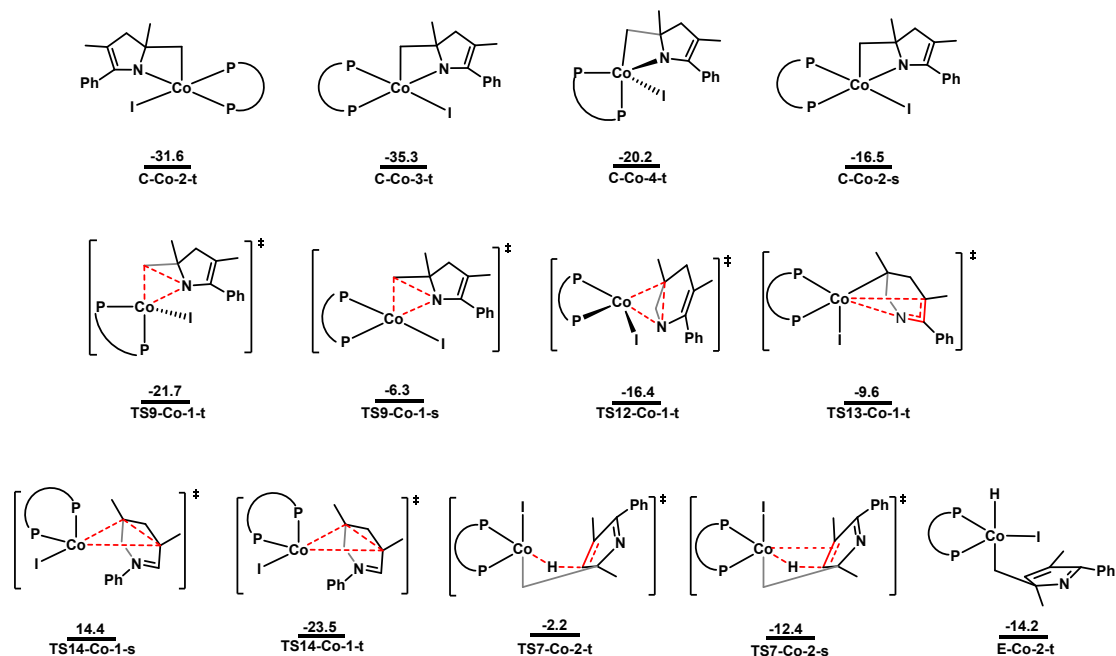

**Fig. S6** Other possible isomers of key species labeled in Figs. 5, 6 and S4. Values

shown are relative free energies in kcal/mol.

## Section 2. Table of energy values.

**Table S1.** Energies (in Hartree) of All TS and Intermediates.

| Geometry            | E <sub>0</sub> | E            | H <sub>298.15</sub> | G <sub>298.15</sub> | E <sub>(sol,M06)</sub> |
|---------------------|----------------|--------------|---------------------|---------------------|------------------------|
| 1a                  | -747.581783    | -747.558003  | -747.556821         | -747.641450         | -747.3503822           |
| 1-Rh                | -4076.955293   | -4076.850623 | -4076.849441        | -4077.118076        | -4077.1286222          |
| 1-Rh-1              | -4076.948696   | -4076.843312 | -4076.842130        | -4077.116856        | -4077.1059969          |
| 1-Rh-2              | -4076.952383   | -4076.848495 | -4076.847313        | -4077.113600        | -4077.1222908          |
| 1-Rh-3              | -4076.932040   | -4076.826437 | -4076.825256        | -4077.101650        | -4077.0872935          |
| 2a                  | -559.034734    | -559.015043  | -559.013861         | -559.087955         | -558.8667092           |
| 2-Rh                | -4076.973458   | -4076.869665 | -4076.868483        | -4077.131362        | -4077.1519555          |
| 2-Rh-1              | -4076.966440   | -4076.863167 | -4076.861985        | -4077.126169        | -4077.1299195          |
| 2-Rh-2              | -4076.977805   | -4076.873138 | -4076.871956        | -4077.146540        | -4077.1018865          |
| 2-Rh-3              | -2697.210785   | -2697.144643 | -2697.143461        | -2697.327061        | -2697.6897003          |
| 3-Rh                | -3888.332107   | -3888.232189 | -3888.231007        | -3888.486703        | -3888.5680843          |
| 3-Rh-1              | -3888.322838   | -3888.222663 | -3888.221481        | -3888.481045        | -3888.5502985          |
| 3-Rh-2              | -3888.322249   | -3888.221422 | -3888.220240        | -3888.479071        | -3888.5662094          |
| 4-Rh                | -4076.996550   | -4076.895453 | -4076.894271        | -4077.150534        | -4077.1741132          |
| 4-Rh-1              | -2697.235549   | -2697.170355 | -2697.169173        | -2697.347127        | -2697.7168527          |
| 5-Rh                | -3888.352481   | -3888.253018 | -3888.251837        | -3888.507476        | -3888.5916938          |
| A-Rh                | -4076.977451   | -4076.872844 | -4076.871662        | -4077.138223        | -4077.1450767          |
| A-Rh-1              | -4076.979196   | -4076.874170 | -4076.872988        | -4077.143499        | -4077.1371883          |
| A-Rh-2              | -4076.972960   | -4076.868253 | -4076.867072        | -4077.136591        | -4077.1329948          |
| B-Rh                | -3888.329256   | -3888.229551 | -3888.228369        | -3888.487136        | -3888.5541421          |
| C-Rh                | -3888.353822   | -3888.253975 | -3888.252793        | -3888.509618        | -3888.5896708          |
| C-Rh-1              | -3888.358810   | -3888.259892 | -3888.258710        | -3888.513058        | -3888.5921943          |
| C-Rh-2              | -3888.358810   | -3888.259892 | -3888.258710        | -3888.513058        | -3888.5921943          |
| E-Rh                | -3888.378236   | -3888.278527 | -3888.277345        | -3888.537811        | -3888.5858696          |
| E-Rh-1              | -3888.365180   | -3888.264713 | -3888.263532        | -3888.524432        | -3053.863246           |
| E-Rh-2              | -3888.362750   | -3888.263072 | -3888.261890        | -3888.522269        | -3888.5782679          |
| RhL <sub>2</sub> Cl | -3329.369866   | -3329.290786 | -3329.289604        | -3329.505434        | -3329.7286976          |
| TS1-Rh              | -4076.942991   | -4076.837944 | -4076.836762        | -4077.110868        | -4077.1128318          |
| TS1-Rh-1            | -4076.914272   | -4076.809100 | -4076.807918        | -4077.079760        | -4077.0703724          |
| TS1-Rh-2            | -4076.903287   | -4076.798673 | -4076.797491        | -4077.071601        | -4077.0521053          |
| TS2-Rh              | -4076.910751   | -4076.804493 | -4076.803312        | -4077.079405        | -4077.0760702          |
| TS2-Rh-1            | -4076.886124   | -4076.779529 | -4076.778347        | -4077.055180        | -4077.0376813          |
| TS3-Rh              | -4076.913624   | -4076.808336 | -4076.807154        | -4077.077347        | -4077.0863772          |
| TS3-Rh-1            | -4076.893423   | -4076.787998 | -4076.786816        | -4077.056788        | -4077.0661548          |
| TS3-Rh-2            | -2697.161405   | -2697.094215 | -2697.093033        | -2697.277891        | -2697.6392233          |
| TS3-Rh-3            | -4076.904702   | -4076.799421 | -4076.798240        | -4077.068865        | -4077.0718795          |
| TS4-Rh              | -4076.942958   | -4076.839902 | -4076.838720        | -4077.101092        | -4077.1245016          |
| TS4-Rh-1            | -4076.948396   | -4076.846681 | -4076.845500        | -4077.101530        | -4077.1253861          |

|          |              |              |              |              |               |
|----------|--------------|--------------|--------------|--------------|---------------|
| TS4-Rh-2 | -4076.909199 | -4076.805750 | -4076.804569 | -4077.070443 | -4077.0825511 |
| TS4-Rh-3 | -2697.197227 | -2697.131723 | -2697.130541 | -2697.311981 | -2697.6720483 |
| TS5-Rh   | -4076.962321 | -4076.858553 | -4076.857371 | -4077.121209 | -4077.1408319 |
| TS5-Rh-1 | -4076.952420 | -4076.849191 | -4076.848009 | -4077.113389 | -4077.1284911 |
| TS5-Rh-2 | -4076.976350 | -4076.872443 | -4076.871261 | -4077.148846 | -4077.104129  |
| TS5-Rh-3 | -2697.215411 | -2697.149502 | -2697.148320 | -2697.330140 | -2697.691107  |
| TS6-Rh   | -3888.352093 | -3888.253996 | -3888.252814 | -3888.504322 | -3888.5926207 |
| TS7-Rh   | -3888.338232 | -3888.239667 | -3888.238486 | -3888.490467 | -3888.5801207 |
| TS7-Rh-1 | -3888.328704 | -3888.228965 | -3888.227784 | -3888.485818 | -3888.5678931 |
| TS8-Rh   | -3888.356018 | -3888.255088 | -3888.253907 | -3888.522692 | -3888.5699704 |
| TS8-Rh-1 | -3888.352653 | -3888.253232 | -3888.252050 | -3888.510731 | -3888.5725764 |
| TS9-Rh   | -3888.318364 | -3888.218660 | -3888.217479 | -3888.472378 | -3888.5694647 |
| TS9-Rh-1 | -3888.321919 | -3888.222267 | -3888.221085 | -3888.476846 | -3888.5662879 |
| TS9-Rh-2 | -3888.316253 | -3888.216064 | -3888.214882 | -3888.474222 | -3888.5564987 |
| 3a       | -559.011173  | -558.992120  | -558.990938  | -559.063239  | -558.8542337  |
| 4a       | -558.995258  | -558.976155  | -558.974973  | -559.047649  | -558.8363596  |
| 1-Co-1-s | -2591.880626 | -2591.810657 | -2591.809475 | -2592.004805 | -4115.3329765 |
| 1-Co-1-t | -2591.931782 | -2591.860847 | -2591.859666 | -2592.064174 | -4115.3651935 |
| 1-Co-s   | -2591.895764 | -2591.826313 | -2591.825131 | -2592.016941 | -4115.3629023 |
| 1-Co-t   | -2591.938332 | -2591.867799 | -2591.866617 | -2592.066669 | -4115.3858981 |
| 2-Co-1-s | -2591.930072 | -2591.861544 | -2591.860362 | -2592.044404 | -4115.4066319 |
| 2-Co-1-t | -2591.912602 | -2591.843377 | -2591.842195 | -2592.030925 | -4115.3929908 |
| 2-Co-2-s | -2591.921746 | -2591.852956 | -2591.851774 | -2592.038121 | -4115.3928937 |
| 2-Co-s   | -2591.932225 | -2591.863480 | -2591.862299 | -2592.049104 | -4115.4046156 |
| 2-Co-t   | -2591.948759 | -2591.877886 | -2591.876705 | -2592.075338 | -4115.3900862 |
| 3-Co-1-s | -2403.271550 | -2403.206052 | -2403.204870 | -2403.384328 | -3926.8039603 |
| 3-Co-1-t | -2403.272408 | -2403.206457 | -2403.205275 | -2403.389415 | -3926.8079678 |
| 3-Co-2-s | -2403.264111 | -2403.198217 | -2403.197035 | -2403.379905 | -3926.7927398 |
| 3-Co-2-t | -2403.303420 | -2403.236938 | -2403.235757 | -2403.421999 | -3926.827502  |
| 3-Co-s   | -2403.276816 | -2403.211034 | -2403.209852 | -2403.390174 | -3926.8120355 |
| 3-Co-t   | -2403.293272 | -2403.227074 | -2403.225893 | -2403.409771 | -3926.8191314 |
| 4-Co-1-s | -2591.947695 | -2591.880159 | -2591.878977 | -2592.061462 | -4115.4260682 |
| 4-Co-1-t | -2403.326573 | -2403.261328 | -2403.260146 | -2403.443388 | -3926.8514166 |
| 4-Co-2-t | -2591.954732 | -2591.885797 | -2591.884615 | -2592.076992 | -4115.4094408 |
| 4-Co-s   | -2591.943678 | -2591.875713 | -2591.874531 | -2592.060053 | -4115.4205307 |
| 4-Co-t   | -2591.955636 | -2591.887424 | -2591.886242 | -2592.076350 | -4115.4122698 |
| 5-Co-1-s | -2403.284220 | -2403.219956 | -2403.218774 | -2403.396255 | -3926.8262672 |
| 5-Co-1-t | -2403.310900 | -2403.245862 | -2403.244680 | -2403.426658 | -3926.833656  |
| 5-Co-s   | -2403.286708 | -2403.222661 | -2403.221479 | -2403.397077 | -3926.8285038 |
| 5-Co-t   | -2403.304574 | -2403.240402 | -2403.239220 | -2403.417480 | -3926.8293215 |
| 6-Co-s   | -2403.281564 | -2403.217141 | -2403.215960 | -2403.394831 | -3926.8160061 |
| 6-Co-t   | -2403.313513 | -2403.247610 | -2403.246429 | -2403.431982 | -3926.834957  |
| 7-Co-s   | -2403.278354 | -2403.214415 | -2403.213233 | -2403.387411 | -3926.8270128 |

|            |              |              |              |              |               |
|------------|--------------|--------------|--------------|--------------|---------------|
| 7-Co-t     | -2403.305492 | -2403.240288 | -2403.239106 | -2403.421526 | -3926.8311905 |
| 8-Co-t     | -2403.294407 | -2403.229430 | -2403.228248 | -2403.411386 | -3926.8268479 |
| 9-Co-t     | -2403.303777 | -2403.239496 | -2403.238314 | -2403.418392 | -3926.8271241 |
| A-Co-s     | -2591.939051 | -2591.869661 | -2591.868479 | -2592.058747 | -4115.4046416 |
| A-Co-t     | -2591.939008 | -2591.869606 | -2591.868424 | -2592.062694 | -4115.3943863 |
| C-Co-1-s   | -2403.305399 | -2403.240907 | -2403.239725 | -2403.417782 | -3926.8394763 |
| C-Co-1-t   | -2403.310368 | -2403.244427 | -2403.243245 | -2403.429538 | -3926.8284972 |
| C-Co-2-s   | -2403.289889 | -2403.225413 | -2403.224231 | -2403.401880 | -3926.8207248 |
| C-Co-2-t   | -2403.317502 | -2403.251811 | -2403.250629 | -2403.436752 | -3926.8350065 |
| C-Co-3-t   | -2403.319857 | -2403.254413 | -2403.253232 | -2403.438543 | -3926.8423964 |
| C-Co-4-t   | -2403.321737 | -2403.255293 | -2403.254112 | -2403.444526 | -3926.8117556 |
| C-Co-s     | -2403.295262 | -2403.230725 | -2403.229543 | -2403.407889 | -3926.826531  |
| C-Co-t     | -2403.320815 | -2403.256462 | -2403.255281 | -2403.433994 | -3926.8402681 |
| Co-s       | -1844.294782 | -1844.251125 | -1844.249943 | -1844.386641 | -3367.9549102 |
| Co-t       | -1844.341702 | -1844.297553 | -1844.296371 | -1844.437202 | -3367.9908106 |
| E-Co-1-s   | -2403.293639 | -2403.228661 | -2403.227479 | -2403.408074 | -3926.8197135 |
| E-Co-1-t   | -2403.289889 | -2403.224043 | -2403.222861 | -2403.409417 | -3926.8098773 |
| E-Co-2-t   | -2403.294295 | -2403.228452 | -2403.227271 | -2403.414798 | -3926.8030344 |
| E-Co-s     | -2403.287224 | -2403.222541 | -2403.221359 | -2403.400060 | -3926.8129289 |
| G-Co-s     | -2403.268668 | -2403.204186 | -2403.203005 | -2403.382061 | -3926.8132141 |
| G-Co-t     | -2403.312984 | -2403.247726 | -2403.246545 | -2403.433641 | -3926.8392463 |
| TS1-Co-1-s | -2591.861483 | -2591.791707 | -2591.790526 | -2591.984655 | -4115.3065149 |
| TS1-Co-1-t | -2591.913118 | -2591.843455 | -2591.842273 | -2592.041799 | -4115.337993  |
| TS1-Co-s   | -2591.889389 | -2591.821222 | -2591.820040 | -2592.008516 | -4115.3504697 |
| TS1-Co-t   | -2591.922942 | -2591.853717 | -2591.852535 | -2592.047437 | -4115.3858981 |
| TS3-Co-1-s | -2591.852388 | -2591.782169 | -2591.780987 | -2591.972436 | -4115.3200818 |
| TS3-Co-1-t | -2591.891978 | -2591.822171 | -2591.820989 | -2592.013509 | -4115.3507605 |
| TS3-Co-2-s | -2591.857126 | -2591.787698 | -2591.786516 | -2591.976698 | -4115.3288722 |
| TS3-Co-s   | -2591.859990 | -2591.789937 | -2591.788755 | -2591.980079 | -4115.3297853 |
| TS3-Co-t   | -2591.897170 | -2591.826997 | -2591.825816 | -2592.018559 | -4115.3623557 |
| TS4-Co-1-s | -2591.914002 | -2591.846551 | -2591.845369 | -2592.027398 | -4115.3862664 |
| TS4-Co-1-t | -2591.919836 | -2591.850402 | -2591.849220 | -2592.041501 | -4115.3729977 |
| TS4-Co-2-s | -2591.902173 | -2591.834677 | -2591.833496 | -2592.015217 | -4115.3816804 |
| TS4-Co-s   | -2591.914304 | -2591.847756 | -2591.846574 | -2592.026260 | -4115.3874582 |
| TS4-Co-t   | -2591.925597 | -2591.855916 | -2591.854734 | -2592.048335 | -4115.3810837 |
| TS5-Co-1-s | -2591.907281 | -2591.838502 | -2591.837321 | -2592.025462 | -4115.3800933 |
| TS5-Co-1-t | -2591.926883 | -2591.857081 | -2591.855899 | -2592.050120 | -4115.3818328 |
| TS5-Co-s   | -2591.917626 | -2591.849359 | -2591.848177 | -2592.034039 | -4115.3921896 |
| TS5-Co-t   | -2591.929786 | -2591.859955 | -2591.858773 | -2592.052682 | -3926.8514166 |
| TS6-Co-s   | -2403.291256 | -2403.227816 | -2403.226635 | -2403.401292 | -3926.8287582 |
| TS6-Co-t   | -2403.280770 | -2403.219026 | -2403.217844 | -2403.389218 | -3926.8114628 |
| TS7-Co-1-s | -2403.277739 | -2403.213766 | -2403.212584 | -2403.389584 | -3926.8180643 |
| TS7-Co-1-t | -2403.287407 | -2403.221620 | -2403.220438 | -2403.407435 | -3926.7983489 |

|             |              |              |              |              |               |
|-------------|--------------|--------------|--------------|--------------|---------------|
| TS7-Co-2-s  | -2403.273749 | -2403.209797 | -2403.208615 | -2403.383067 | -3926.8133494 |
| TS7-Co-2-t  | -2403.286724 | -2403.223196 | -2403.222015 | -2403.402195 | -3926.785347  |
| TS8-Co-1-s  | -2403.278557 | -2403.213589 | -2403.212408 | -2403.395998 | -3926.7964632 |
| TS8-Co-s    | -2403.282729 | -2403.217585 | -2403.216403 | -2403.402106 | -3926.7983191 |
| TS8-Co-t    | -2403.304053 | -2403.238431 | -2403.237249 | -2403.427284 | -3926.8058982 |
| TS9-Co-1-s  | -2403.258049 | -2403.193375 | -2403.192193 | -2403.371830 | -3926.8010737 |
| TS9-Co-1-t  | -2403.304073 | -2403.239503 | -2403.238322 | -2403.421786 | -3926.8198604 |
| TS9-Co-s    | -2403.265804 | -2403.201087 | -2403.199905 | -2403.379492 | -3926.8027068 |
| TS9-Co-t    | -2403.304939 | -2403.239402 | -2403.238220 | -2403.424961 | -3926.8261449 |
| TS10-Co-s   | -2403.255407 | -2403.190774 | -2403.189593 | -2403.371081 | -3926.7915098 |
| TS10-Co-t   | -2403.301445 | -2403.235752 | -2403.234571 | -2403.424312 | -3926.8194832 |
| TS11-Co-s   | -2403.257867 | -2403.194656 | -2403.193475 | -2403.370403 | -3926.7825048 |
| TS11-Co-t   | -2403.309867 | -2403.245857 | -2403.244675 | -2403.429921 | -3926.8114356 |
| TS12-Co-1-t | -2403.291728 | -2403.226398 | -2403.225217 | -2403.409885 | -3926.8119609 |
| TS12-Co-s   | -2403.259707 | -2403.196408 | -2403.195227 | -2403.370120 | -3926.7937364 |
| TS12-Co-t   | -2403.297347 | -2403.233005 | -2403.231824 | -2403.415689 | -3926.8189533 |
| TS13-Co-1-t | -2403.279870 | -2403.214891 | -2403.213710 | -2403.395621 | -3926.8039962 |
| TS13-Co-s   | -2403.278584 | -2403.215305 | -2403.214123 | -2403.387243 | -3926.8185501 |
| TS13-Co-t   | -2403.289584 | -2403.224567 | -2403.223386 | -2403.404865 | -3926.8241401 |
| TS14-Co-1-s | -2403.227117 | -2403.162843 | -2403.161661 | -2403.339492 | -3926.7715469 |
| TS14-Co-1-t | -2403.295235 | -2403.230228 | -2403.229047 | -2403.412003 | -3926.8257339 |
| TS14-Co-s   | -2403.239549 | -2403.176655 | -2403.175474 | -2403.351580 | -3926.7896481 |
| TS14-Co-t   | -2403.296358 | -2403.231340 | -2403.230158 | -2403.414510 | -3926.8271242 |
| TS15-Co-t   | -2403.286383 | -2403.222249 | -2403.221067 | -2403.400852 | -3926.8231734 |
| TS16-Co-t   | -2403.284689 | -2403.219764 | -2403.218583 | -2403.402350 | -3926.8075086 |
| TS17-Co-t   | -2403.292670 | -2403.228891 | -2403.227710 | -2403.406219 | -3926.8322529 |

$E_0$  = Sum of electronic and zero-point energies calculated by B3LYP in solvent

$E$  = Sum of electronic and thermal energies calculated by B3LYP in solvent

$H_{298.15}$  = Sum of electronic and thermal enthalpies calculated by B3LYP in solvent

$G_{298.15}$  = Sum of electronic and thermal free energies calculated by B3LYP in solvent

$E_{(M06)}$  = Single point energies calculated by M06 in solvent

### Section 3. Calculated imaginary frequencies of all transition states species.

| Species | Frequency |
|---------|-----------|
|---------|-----------|



|            |         |
|------------|---------|
| TS1-Rh     | -74.39  |
| TS1-Rh-1   | -373.20 |
| TS1-Rh-2   | -375.76 |
| TS2-Rh     | -436.58 |
| TS2-Rh-1   | -243.12 |
| TS3-Rh     | -457.22 |
| TS3-Rh-1   | -455.52 |
| TS3-Rh-2   | -393.58 |
| TS3-Rh-3   | -460.09 |
| TS4-Rh     | -362.60 |
| TS4-Rh-1   | -341.28 |
| TS4-Rh-2   | -439.32 |
| TS4-Rh-3   | -283.01 |
| TS5-Rh     | -323.08 |
| TS5-Rh-1   | -301.25 |
| TS5-Rh-2   | -312.73 |
| TS5-Rh-3   | -356.00 |
| TS6-Rh     | -55.06  |
| TS7-Rh     | -652.33 |
| TS7-Rh-1   | -589.05 |
| TS8-Rh     | -875.02 |
| TS8-Rh-1   | -830.78 |
| TS9-Rh     | -327.15 |
| TS9-Rh-1   | -338.67 |
| TS9-Rh-2   | -387.87 |
| TS1-Co-1-s | -233.49 |
| TS1-Co-1-t | -885.85 |
| TS1-Co-s   | -323.63 |
| TS1-Co-t   | -505.75 |
| TS3-Co-1-s | -388.06 |
| TS3-Co-1-t | -394.40 |
| TS3-Co-2-s | -376.79 |
| TS3-Co-s   | -439.70 |
| TS3-Co-t   | -401.47 |
| TS4-Co-1-s | -269.32 |
| TS4-Co-1-t | -456.16 |
| TS4-Co-2-s | -393.08 |
| TS4-Co-s   | -330.41 |
| TS4-Co-t   | -468.96 |
| TS5-Co-1-s | -263.63 |
| TS5-Co-1-t | -419.38 |
| TS5-Co-s   | -272.48 |
| TS5-Co-t   | -391.82 |

|             |          |
|-------------|----------|
| TS6-Co-s    | -27.69   |
| TS6-Co-t    | -222.38  |
| TS7-Co-1-s  | -734.61  |
| TS7-Co-1-t  | -1359.22 |
| TS7-Co-2-s  | -628.74  |
| TS7-Co-2-t  | -1318.43 |
| TS8-Co-1-s  | -936.47  |
| TS8-Co-s    | -792.45  |
| TS8-Co-t    | -100.11  |
| TS9-Co-1-t  | -449.56  |
| TS9-Co-1-s  | -361.19  |
| TS9-Co-s    | -420.29  |
| TS9-Co-t    | -320.73  |
| TS10-Co-s   | -144.40  |
| TS10-Co-t   | -375.78  |
| TS11-Co-s   | -136.33  |
| TS11-Co-t   | -99.22   |
| TS12-Co-1-t | -361.06  |
| TS12-Co-s   | -175.35  |
| TS12-Co-t   | -743.76  |
| TS13-Co-1-t | -207.46  |
| TS13-Co-s   | -58.56   |
| TS13-Co-t   | -149.98  |
| TS14-Co-1-s | -217.89  |
| TS14-Co-1-t | -204.13  |
| TS14-Co-s   | -173.98  |
| TS14-Co-t   | -207.52  |
| TS15-Co-t   | -40.57   |
| TS16-Co-t   | -249.63  |
| TS17-Co-t   | -187.82  |
